# Supplementary material for: Population-Modifiable Risk Factors Associated With Childhood Stunting in Sub-Saharan Africa
Source: PubMed Central journal article supplement (PMC10585405; doi:10.1001/jamanetworkopen.2023.38321), 2023-10-18
Supplement: jamanetwopen-e2338321-s001.pdf [file jamanetwopen-e2338321-s001.pdf]

## Supplemental Online Content

Ahmed KY, Dadi AF, Ogbo FA, et al. Population-modifiable risk factors associated with childhood stunting in sub-Saharan Africa. *JAMA Netw Open*. 2023;6(10):e2338321. doi:10.1001/jamanetworkopen.2023.38321

**eTable 1.** Characteristics of Study Participants for Stunting and Severe Stunting Among Children Under Five in Sub-Saharan Africa Countries, 2014-2021 (145,900)

**eTable 2.** Prevalence of Stunting and Severe Stunting Among Children in Sub-Saharan Africa Countries, 2014-2021

**eAppendix.** Formulas for the Population Attributable Fraction and the Joint Population Attributable Fraction

This supplemental material has been provided by the authors to give readers additional information about their work.

**eTable 1.** Characteristics of Study Participants for Stunting and Severe Stunting Among Children Under Five in Sub-Saharan Africa Countries, 2014-2021 (145,900)

| Variables                          | Total population | Stunting     |              | Severe stunting |               |
|------------------------------------|------------------|--------------|--------------|-----------------|---------------|
|                                    | n (%)            | Yes, n (%)   | No, n (%)    | Yes, n (%)      | No, n (%)     |
| <b>Child factors</b>               |                  |              |              |                 |               |
| Recent diarrhoeal episodes         |                  |              |              |                 |               |
| No                                 | 123626 (84.9)    | 38203 (82.9) | 85423 (85.8) | 14213 (81.8)    | 109413 (85.3) |
| Yes                                | 22041 (15.1)     | 7885 (17.1)  | 14156 (14.2) | 3158 (18.2)     | 18883 (14.7)  |
| Acute respiratory tract infections |                  |              |              |                 |               |
| No                                 | 138769 (95.1)    | 43729 (94.7) | 95040 (95.3) | 16410 (94.9)    | 122360 (95.2) |
| Yes                                | 7132 (4.9)       | 2436 (5.3)   | 4695 (4.7)   | 995 (5.1)       | 6137 (4.8)    |
| Dairy products consumption         |                  |              |              |                 |               |
| No                                 | 123439 (84.6)    | 40329 (87.4) | 83110 (83.3) | 15321 (88.0)    | 108118 (84.1) |
| Yes                                | 22462 (15.4)     | 5837 (12.6)  | 16625 (16.7) | 2083 (12.0)     | 20379 (15.9)  |
| <b>Maternal factors</b>            |                  |              |              |                 |               |
| Maternal BMI                       |                  |              |              |                 |               |
| Normal weight                      | 75932 (53.9)     | 27237 (60.2) | 48695 (50.8) | 10671 (62.2)    | 65261 (52.8)  |
| Underweight                        | 11017 (7.8)      | 4682 (10.3)  | 6335 (6.6)   | 2092 (12.2)     | 8925 (7.2)    |
| Overweight/obesity                 | 53851 (38.2)     | 13348 (29.5) | 40504 (42.6) | 4398 (25.6)     | 49453 (40.0)  |
| Maternal education                 |                  |              |              |                 |               |
| No formal education                | 57460 (39.4)     | 21322 (46.2) | 36139 (36.2) | 9279 (53.3)     | 48182 (37.5)  |
| Primary education                  | 51090 (35.0)     | 16964 (36.7) | 34125 (34.2) | 5883 (33.8)     | 45207 (35.2)  |
| Secondary or higher                | 37345 (25.6)     | 7880 (17.1)  | 29466 (29.5) | 2243 (12.9)     | 35102 (27.3)  |
| Maternal employment                |                  |              |              |                 |               |
| Not working                        | 91251 (66.6)     | 29827 (68.0) | 61424 (66.0) | 11013 (65.9)    | 80238 (66.7)  |
| Working                            | 45666 (33.4)     | 14018 (32.0) | 31648 (34.0) | 5691 (34.1)     | 39976 (33.3)  |
| Antenatal care                     |                  |              |              |                 |               |
| None                               | 11383 (11.1)     | 4633 (15.1)  | 6750 (9.3)   | 2266 (20.4)     | 9117 (9.9)    |
| 1-3 visits                         | 35084 (34.1)     | 11259 (36.7) | 23825 (33.0) | 4041 (36.4)     | 31042 (33.8)  |
| 4+ visits                          | 56448 (54.8)     | 14749 (48.1) | 41699 (57.7) | 4806 (43.2)     | 51642 (56.2)  |
| Place of birth                     |                  |              |              |                 |               |
| Home                               | 52659 (36.1)     | 20399 (44.2) | 32261 (32.4) | 8958 (51.5)     | 43701 (34.0)  |
| Health facility                    | 93162 (63.9)     | 25743 (55.8) | 67419 (67.6) | 8435 (48.5)     | 84727 (66.0)  |
| <b>Household factors</b>           |                  |              |              |                 |               |
| Household wealth                   |                  |              |              |                 |               |
| Poor                               | 64358 (44.1)     | 24577 (53.2) | 39780 (40.0) | 9955 (57.2)     | 54402 (42.3)  |
| Middle                             | 29157 (20.0)     | 9450 (20.5)  | 19707 (19.7) | 3442 (19.8)     | 25715 (20.0)  |
| Rich                               | 52386 (35.9)     | 12138 (26.3) | 40248 (40.3) | 4007 (23.0)     | 48379 (37.7)  |
| Type of toilet system              |                  |              |              |                 |               |
| Not improved                       | 78242 (55.0)     | 28227 (63.0) | 50015 (51.3) | 11487 (67.9)    | 66755 (53.2)  |
| Improved                           | 64098 (45.0)     | 16576 (37.0) | 47522 (48.7) | 5434 (32.1)     | 58664 (46.8)  |
| Source of drinking water           |                  |              |              |                 |               |
| Not Protected                      | 66589 (45.6)     | 23166 (50.2) | 43423 (43.5) | 8914 (51.2)     | 57675 (44.9)  |
| Protected                          | 79312 (54.4)     | 23000 (49.8) | 56312 (56.5) | 8490 (48.8)     | 70822 (55.1)  |
| Type of cooking fuel               |                  |              |              |                 |               |
| Not cleaned                        | 127953 (87.8)    | 42825 (92.8) | 85129 (85.5) | 16377 (94.1)    | 111577 (87.0) |
| Cleaned                            | 17742 (12.2)     | 3315 (7.2)   | 14427 (14.5) | 1019 (5.9)      | 16723 (13.0)  |

**eTable 2.** Prevalence of Stunting and Severe Stunting Among Children in Sub-Saharan Africa Countries, 2014-2021

| Countries                      | Stunting    |                |                | Severe stunting |                |                |
|--------------------------------|-------------|----------------|----------------|-----------------|----------------|----------------|
|                                | Prevalence  | Upper interval | Lower interval | Prevalence      | Upper interval | Lower interval |
| Angola, DHS 2015-16            | 37.0        | 35.8           | 38.3           | 14.6            | 13.7           | 15.6           |
| Benin, DHS 2017-18             | 31.6        | 30.8           | 32.5           | 10.5            | 9.9            | 11.0           |
| Burundi, DHS 2016-17           | 55.8        | 54.6           | 57.1           | 24.8            | 23.7           | 25.8           |
| Cameroon, DHS 2018             | 29.2        | 27.9           | 30.6           | 13.7            | 12.7           | 14.7           |
| Chad, DHS 2014-15              | 39.6        | 38.7           | 40.6           | 21.7            | 20.9           | 22.5           |
| Ethiopia, DHS 2015-16          | 38.4        | 37.4           | 39.4           | 17.4            | 16.6           | 18.1           |
| Gambia, DHS 2019-20            | 17.1        | 15.8           | 18.3           | 3.5             | 2.9            | 4.1            |
| Ghana, DHS 2014                | 17.9        | 16.5           | 19.5           | 4.8             | 4.0            | 5.7            |
| Guinea, DHS 2018               | 31.0        | 29.5           | 32.6           | 13.7            | 12.6           | 14.9           |
| Kenya, DHS 2014                | 25.8        | 25.1           | 26.5           | 7.8             | 7.4            | 8.1            |
| Lesotho, DHS 2014              | 32.4        | 29.9           | 35.1           | 10.5            | 8.9            | 12.3           |
| Liberia, DHS 2019-20           | 28.8        | 26.9           | 30.8           | 8.8             | 7.6            | 10.1           |
| Madagascar, DHS 2021           | 39.3        | 38.1           | 40.6           | 12.5            | 11.7           | 13.5           |
| Malawi, DHS 2015-16            | 36.6        | 35.2           | 37.9           | 10.5            | 9.7            | 11.4           |
| Mali, DHS 2018                 | 26.8        | 25.9           | 27.7           | 10.1            | 9.4            | 10.7           |
| Mauritania, DHS 2019-21        | 25.4        | 24.5           | 26.3           | 8.3             | 7.8            | 8.9            |
| Nigeria, DHS 2018              | 36.6        | 35.7           | 37.5           | 16.9            | 16.2           | 17.6           |
| Rwanda, DHS 2019-20            | 33.2        | 31.7           | 34.7           | 9.0             | 8.1            | 10.0           |
| Senegal, DHS 2019              | 17.7        | 16.6           | 18.7           | 4.8             | 4.2            | 5.4            |
| Sierra Leone, DHS 2019         | 29.0        | 27.6           | 30.5           | 10.3            | 9.4            | 11.3           |
| South Africa, DHS 2016         | 26.6        | 23.9           | 29.3           | 10.1            | 8.3            | 12.0           |
| Tanzania, DHS 2015-16          | 34.1        | 33.1           | 35.1           | 11.4            | 10.8           | 12.1           |
| Uganda, DHS 2016               | 28.2        | 26.8           | 29.5           | 8.9             | 8.1            | 9.8            |
| Zambia, DHS 2018               | 34.7        | 33.7           | 35.7           | 11.7            | 11.0           | 12.4           |
| Zimbabwe, DHS 2014-15          | 26.3        | 25.1           | 27.6           | 8.2             | 7.4            | 8.9            |
| <b>Pooled 25 SSA countries</b> | <b>30.6</b> | <b>27.4</b>    | <b>34.1</b>    | <b>10.5</b>     | <b>8.8</b>     | <b>12.6</b>    |

**eAppendix.** Formulas for the Population Attributable Fraction and the Joint Population Attributable Fraction

PAF was calculated using Levin's formula, which determined the proportion of stunting and severe stunting cases in SSA that could be avoided by eliminating modifiable risk factors among the population<sup>1</sup>. PAF was calculated using the following formula:

$$PAF = (P * (RR - 1)) / (1 + (P * (RR - 1)))$$

Where  $p$  is the prevalence of the risk factor in the population, and  $RR$  is the adjusted RRs of stunting and severe stunting associated with the modifiable risk factor<sup>1,2</sup>.

Because risk factors tend to occur together within individuals, adding up the PAFs of each risk factor would result in an inflated estimate of their combined PAFs. Thus, we calculated a joint PAF across all risk factors using the formula<sup>3,4</sup>:

$$PAF (combined) = 1 - \prod_{r=1}^R (1 - PAF_r)$$

Where  $r$  represents each exposure variable. The assumption that exposures are independent and uncorrelated has been diminished with the use of relative risks that have been adjusted for potential confounders.

1. Eide GE. Attributable fractions for partitioning risk and evaluating disease prevention: a practical guide. *Clin Respir J* 2008;2 Suppl 1:92-103. doi: 10.1111/j.1752-699X.2008.00091.x
2. Lin C-K, Chen S-T. Estimation and application of population attributable fraction in ecological studies. *Environmental Health* 2019;18(1):52. doi: 10.1186/s12940-019-0492-4
3. Ogbo FA, Page A, Idoko J, et al. Population attributable risk of key modifiable risk factors associated with non-exclusive breastfeeding in Nigeria. *BMC public health* 2018;18(1):247. doi: 10.1186/s12889-018-5145-y [published Online First: 20180213]
4. Wilson LF, Page AN, Dunn NAM, et al. Population attributable risk of modifiable risk factors associated with invasive breast cancer in women aged 45–69 years in Queensland, Australia. *Maturitas* 2013;76(4):370-76. doi: <https://doi.org/10.1016/j.maturitas.2013.09.002>
