# Supplementary material for: Population-Modifiable Risk Factors Associated With Childhood Stunting in Sub-Saharan Africa
Source: PubMed Central journal article supplement (PMC10585405; doi:10.1001/jamanetworkopen.2023.38321), 2023-10-18
Supplement: jamanetwopen-e2338321-s002.pdf [file jamanetwopen-e2338321-s002.pdf]

## Data Sharing Statement

Ahmed. Population-Modifiable Risk Factors Associated With Childhood Stunting in Sub-Saharan Africa. *JAMA Netw Open*. Published October 18, 2023.

doi:10.1001/jamanetworkopen.2023.38321

### Data

**Data available:** No

### Additional Information

**Explanation for why data not available:** The analysis was based on the Demographic Health Survey. Information on the data and content can be accessed at

<https://dhsprogram.com/data/available-datasets.cfm>
